# Supplementary material
Source: PubMed Central journal article supplement (PMC2836698)
Supplement: 0914061107_pnas.200914061SI.pdf [file 0914061107_pnas.200914061SI.pdf]

# Supporting Information

Xu et al. 10.1073/pnas.0914061107

Table S1. Clinical and demographic characteristics of subjects in CAPS

| Characteristic                                                          | No. (%) of cases       |                       |                       | No. (%) of controls (n = 1,722) |
|-------------------------------------------------------------------------|------------------------|-----------------------|-----------------------|---------------------------------|
|                                                                         | Aggressive (n = 1,231) | Localized (n = 1,619) | All cases (n = 2,899) |                                 |
| Age at enrollment (y)                                                   |                        |                       |                       |                                 |
| Mean (SD)                                                               | 68.04 (7.32)           | 65.14 (6.74)          | 66.36 (7.13)          | 67.15 (7.39)                    |
| Age, y, at diagnosis                                                    |                        |                       |                       |                                 |
| 65                                                                      | 514 (41.75)            | 926 (57.19)           | 1469 (50.78)          | N/A                             |
| >65                                                                     | 717 (58.25)            | 693 (42.81)           | 1424 (49.22)          | N/A                             |
| Family history (first-degree relatives)                                 |                        |                       |                       |                                 |
| No                                                                      | 1013 (82.29)           | 1295 (79.99)          | 2,342 (80.95)         | 1,565 (90.57)                   |
| Yes                                                                     | 218 (17.71)            | 324 (20.01)           | 551 (19.05)           | 163 (9.43)                      |
| Missing data                                                            | 0                      | 0                     | 0                     | 0                               |
| PSA levels at diagnosis for cases or at enrollment for controls (ng/mL) |                        |                       |                       |                                 |
| 4                                                                       | 36 (2.95)              | 185 (11.61)           | 221 (7.85)            | 1,438 (83.56)                   |
| 4.01–9.99                                                               | 171 (14.00)            | 755 (47.39)           | 926 (32.91)           | 230 (13.36)                     |
| 10–19.99                                                                | 216 (17.69)            | 438 (27.50)           | 654 (23.24)           | 37 (2.15)                       |
| 20–49.99                                                                | 252 (20.64)            | 215 (13.50)           | 467 (16.60)           | 13 (0.76)                       |
| 50–99.99                                                                | 229 (18.76)            | 0                     | 229 (8.14)            | 2 (0.12)                        |
| 100                                                                     | 317 (25.96)            | 0                     | 317 (11.27)           | 1 (0.06)                        |
| Missing                                                                 | 10                     | 26                    | 85                    | 1                               |
| T-stage                                                                 |                        |                       |                       |                                 |
| T0                                                                      | 2 (0.16)               | 7 (0.44)              | 9 (0.32)              | N/A                             |
| T1                                                                      | 147 (12.07)            | 933 (58.24)           | 1080 (38.30)          | N/A                             |
| T2                                                                      | 242 (19.87)            | 662 (41.32)           | 904 (32.06)           | N/A                             |
| T3                                                                      | 724 (59.44)            | 0                     | 724 (25.67)           | N/A                             |
| T4                                                                      | 103 (8.46)             | 0                     | 103 (3.65)            | N/A                             |
| TX                                                                      | 13                     | 17                    | 79                    | N/A                             |
| N-stage                                                                 |                        |                       |                       |                                 |
| N0                                                                      | 222 (70.03)            | 302 (100.00)          | 524 (84.65)           | N/A                             |
| N1                                                                      | 95 (29.97)             | 0                     | 95 (15.35)            | N/A                             |
| NX                                                                      | 914                    | 1317                  | 2280                  | N/A                             |
| M-stage                                                                 |                        |                       |                       |                                 |
| M0                                                                      | 589 (68.25)            | 655 (100.00)          | 1244 (81.95)          | N/A                             |
| M1                                                                      | 274 (31.75)            | 0                     | 274 (18.05)           | N/A                             |
| MX                                                                      | 368                    | 964                   | 1381                  | N/A                             |
| Gleason (biopsy)                                                        |                        |                       |                       |                                 |
| 4                                                                       | 9 (0.83)               | 98 (6.32)             | 107 (4.06)            | N/A                             |
| 5                                                                       | 43 (3.96)              | 247 (15.93)           | 290 (10.99)           | N/A                             |
| 6                                                                       | 153 (14.08)            | 832 (53.64)           | 985 (37.34)           | N/A                             |
| 7                                                                       | 414 (38.09)            | 374 (24.11)           | 788 (29.87)           | N/A                             |
| 8                                                                       | 258 (23.74)            | 0                     | 258 (9.78)            | N/A                             |
| 9                                                                       | 185 (17.02)            | 0                     | 185 (7.01)            | N/A                             |
| 10                                                                      | 25 (2.30)              | 0                     | 25                    | N/A                             |
| Missing                                                                 | 144                    | 68                    | 261                   | N/A                             |

Forty-nine patients could not be classified as having aggressive or localized disease because of missing phenotypes.

**Table S2. Clinical and demographic characteristics of study subjects**

| Characteristic                                                          | No. (%) of cases          |                         |                          | Controls<br>(n = 482) |
|-------------------------------------------------------------------------|---------------------------|-------------------------|--------------------------|-----------------------|
|                                                                         | Aggressive<br>(n = 1,408) | Indolent<br>(n = 4,318) | All cases<br>(n = 5,955) |                       |
| Age at enrollment (y)                                                   |                           |                         |                          |                       |
| Mean (SD)                                                               | 59.8 (6.72)               | 57.7 (6.49)             | 58.3 (6.69)              | 59.91 (7.19)          |
| Age at diagnosis (y)                                                    |                           |                         |                          |                       |
| ≤65                                                                     | 1,112 (78.98)             | 3,833 (88.77)           | 5,115 (85.89)            |                       |
| >65                                                                     | 296 (21.02)               | 485 (11.23)             | 839 (14.09)              |                       |
| PSA levels at diagnosis for cases or at enrollment for controls (ng/mL) |                           |                         |                          |                       |
| ≤4                                                                      | 139 (9.87)                | 1,095 (25.36)           | 1,262 (21.19)            | 481 (99.79)           |
| 4.01–9.99                                                               | 611 (43.39)               | 2,264 (52.43)           | 2,951 (49.55)            | 0                     |
| 10–19.99                                                                | 182 (12.93)               | 247 (5.72)              | 451 (7.57)               | 0                     |
| 20–49.99                                                                | 84 (5.97)                 | 36 (0.83)               | 131 (2.2)                | 0                     |
| 50–99.99                                                                | 34 (2.41)                 | 4 (0.09)                | 58 (0.97)                | 0                     |
| ≥100                                                                    | 63 (4.47)                 | 3 (0.07)                | 117 (1.96)               | 0                     |
| Missing                                                                 | 196 (13.92)               | 669 (15.49)             | 985 (16.54)              | 1 (0.21)              |
| T-stage                                                                 |                           |                         |                          |                       |
| T0                                                                      | NA                        | NA                      | NA                       | NA                    |
| T1                                                                      | NA                        | NA                      | NA                       | NA                    |
| T2                                                                      | 368 (26.14)               | 3,416 (79.11)           | 3,850 (64.65)            | NA                    |
| T3a                                                                     | 536 (38.07)               | 902 (20.89)             | 1,454 (24.42)            | NA                    |
| T3b/c                                                                   | 355 (25.21)               | 0                       | 355 (5.96)               | NA                    |
| T3/T3X                                                                  | 9 (0.64)                  | 0                       | 15 (0.25)                | NA                    |
| T4                                                                      | 3 (0.21)                  | 0                       | 3 (0.05)                 | NA                    |
| TX                                                                      | 137 (9.73)                | 0                       | 278 (4.67)               | NA                    |
| N-stage                                                                 |                           |                         |                          |                       |
| N0                                                                      | 1,085 (77.06)             | 4,318 (100)             | 5,469 (91.84)            | NA                    |
| N1                                                                      | 140 (9.94)                | 0 (0)                   | 140 (2.35)               | NA                    |
| NX                                                                      | 183 (13)                  | 0 (0)                   | 346 (5.81)               | NA                    |
| M-stage                                                                 |                           |                         |                          |                       |
| M0                                                                      | NA                        | NA                      | NA                       | NA                    |
| M1                                                                      | NA                        | NA                      | NA                       | NA                    |
| MX                                                                      | 1,408                     | 4,318                   | 5,955                    | NA                    |
| Gleason score (biopsy)                                                  |                           |                         |                          |                       |
| ≤4                                                                      | 0                         | 0                       | 2 (0.03)                 | NA                    |
| 5                                                                       | 2 (0.14)                  | 67 (1.55)               | 73 (1.23)                | NA                    |
| 6                                                                       | 23 (1.63)                 | 3,042 (70.45)           | 3,104 (52.12)            | NA                    |
| 7 (3+4)                                                                 | 106 (7.53)                | 1,254 (29.04)           | 1,411 (23.69)            | NA                    |
| 7(4+3)                                                                  | 667 (47.37)               | 0                       | 667 (11.2)               | NA                    |
| 8                                                                       | 317 (22.51)               | 0                       | 317 (5.32)               | NA                    |
| 9                                                                       | 265 (18.82)               | 0                       | 265 (4.45)               | NA                    |
| 10                                                                      | 18 (1.28)                 | 0                       | 18 (0.3)                 | NA                    |
| Missing                                                                 | 10 (0.71)                 | 0                       | 98 (1.65)                | NA                    |

A total of 229 patients could not be classified as having aggressive or indolent disease because of missing phenotypes.
